# Supplementary material
Source: HighWire-hosted journal article supplement (https://jitc.bmj.com/content/7/1/44)
Supplement: media-1 [file media-1.pdf]

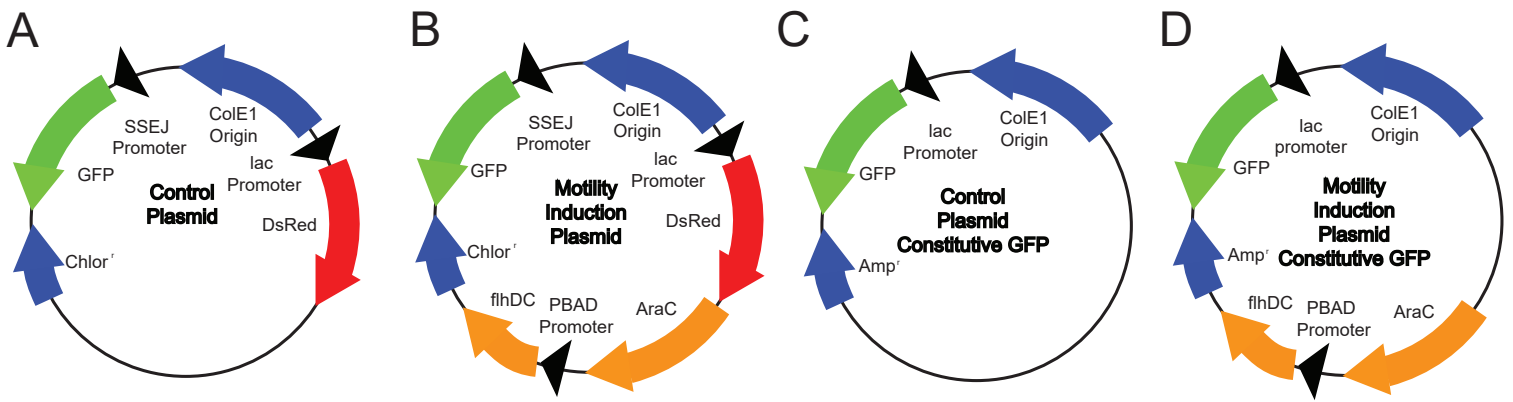

**Figure S1. The four plasmids used in this study.** **A)** The control plasmid contains the  $P_{SSEJ}/GFP$  and  $P_{lac}/DsRed$  genetic circuits as well as chloramphenicol resistance and the ColE1 origin of replication. It was transformed into the Sal and S-Sal ( $\Delta sipB$ ) strains. **B)** The motility induction plasmid contains all of the components of the control plasmid (panel A) in addition to an arabinose inducible  $P_{BAD}/flhDC$  genetic circuit. This plasmid was transformed into the F-Sal and FS-Sal strains. **C)** The constitutive GFP control plasmid contains the  $P_{lac}/GFP$  genetic circuit, ampicillin resistance, and the ColE1 origin of replication. This plasmid was transformed into the control *Salmonella* and  $\Delta flgE$  strains for measurement of cell invasion and intracellular growth. **D)** The motility induction, constitutive GFP plasmid contains all of the components of the constitutive GFP plasmid (panel C) in addition to an arabinose inducible  $P_{BAD}/flhDC$  genetic circuit. This plasmid was transformed into the *Salmonella+pflhDC* and  $\Delta flgE+pflhDC$  strains for measurement of cell invasion and intracellular growth.
